# Supplementary material for: Short versus standard peroral endoscopic myotomy for esophageal achalasia: a systematic review and meta-analysis
Source: PubMed Central journal article supplement — Ann Gastroenterol. 2021 Jun 14;34(5):634–42. doi: 10.20524/aog.2021.0644 (PMC8375650; doi:10.20524/aog.2021.0644), 2021-06-14
Supplement: AnnGastroenterol-34-634_Suppl1.pdf [file AnnGastroenterol-34-634_Suppl1.pdf]

## Supplementary material

**Supplementary Table 1** Detailed search strategy

| Database       | Search | Query                                                                                                                                                                                                                                                                                                                                                                                                                                                                             | Items   |
|----------------|--------|-----------------------------------------------------------------------------------------------------------------------------------------------------------------------------------------------------------------------------------------------------------------------------------------------------------------------------------------------------------------------------------------------------------------------------------------------------------------------------------|---------|
| PubMed         | #1     | ((("peroral"[All Fields] OR "perorally"[All Fields] OR "per-oral"[All Fields]) AND ("endoscopes"[All Fields] OR "endoscoped"[All Fields] OR "endoscopes"[MeSH Terms] OR "endoscopes"[All Fields] OR "endoscope"[All Fields] OR "endoscopic"[All Fields] OR "endoscopically"[All Fields] OR "endoscopy"[MeSH Terms] OR "endoscopy"[All Fields] OR "endoscopic"[All Fields]) AND ("myotomy"[MeSH Terms] OR "myotomy"[All Fields] OR "myotomies"[All Fields])) OR "POEM"[All Fields] | 1954    |
|                | #2     | "esophageal achalasia"[MeSH Terms] OR ("esophageal"[All Fields] AND "achalasia"[All Fields]) OR "esophageal achalasia"[All Fields] OR "achalasia"[All Fields]                                                                                                                                                                                                                                                                                                                     | 8677    |
|                | #3     | "short"[All Fields] OR "shorts"[All Fields] OR "shorter"[All Fields]                                                                                                                                                                                                                                                                                                                                                                                                              | 983,747 |
|                | #4     | #1 AND #2 AND #3                                                                                                                                                                                                                                                                                                                                                                                                                                                                  | 170     |
|                | #5     | #4 NOT ("case reports"[Publication Type] OR "editorial"[Publication Type] OR "guideline"[Publication Type] OR "introductory journal article"[Publication Type] OR "meta analysis"[Publication Type] OR "news"[Publication Type] OR "practice guideline"[Publication Type] OR "review"[Publication Type] OR "systematic review"[Publication Type])                                                                                                                                 | 113     |
| Embase         | #1     | (peroral OR 'per oral') AND endoscopic AND ('myotomy'/exp OR myotomy) OR poem                                                                                                                                                                                                                                                                                                                                                                                                     | 3792    |
|                | #2     | achalasia                                                                                                                                                                                                                                                                                                                                                                                                                                                                         | 13522   |
|                | #3     | short OR shorter                                                                                                                                                                                                                                                                                                                                                                                                                                                                  | 1927915 |
|                | #4     | #1 AND #2 AND #3                                                                                                                                                                                                                                                                                                                                                                                                                                                                  | 476     |
|                | #5     | #4 NOT ('animal cell'/de OR 'animal experiment'/de OR 'animal model'/de OR 'animal tissue'/de OR 'case report'/de OR 'clinical protocol'/de OR 'diagnostic test accuracy study'/de OR 'meta analysis'/de OR 'methodology'/de OR 'nonhuman'/de OR 'practice guideline'/de OR 'questionnaire'/de OR 'systematic review'/de OR 'chapter'/it OR 'editorial'/it OR 'erratum'/it OR 'note'/it OR 'review'/it OR 'short survey'/it)                                                      | 340     |
|                | #6     | #5 AND [embase]/lim NOT ([embase]/lim AND [medline]/lim)                                                                                                                                                                                                                                                                                                                                                                                                                          | 254     |
| Web of science | #1     | (((((peroral OR per-oral) AND endoscopic AND myotomy) OR POEM) AND (achalasia)) AND (short OR shorter))<br>Refined by: [excluding] DOCUMENT TYPES: (REVIEW OR EDITORIAL MATERIAL OR LETTER)                                                                                                                                                                                                                                                                                       | 137     |
| Cochrane       | #1     | (poem OR myotomy) AND achalasia AND (short OR shorter)                                                                                                                                                                                                                                                                                                                                                                                                                            | 64      |

**Supplementary Table 2** Summary of pooled effect estimates of preoperative, perioperative, and postoperative outcomes

| Outcome                                   | Studies | Participants | Statistical method     | Estimate [95%CI]       | P-value | I <sup>2</sup> |
|-------------------------------------------|---------|--------------|------------------------|------------------------|---------|----------------|
| Preoperative Eckardt score                | 4       | 401          | MD (IV, Random, 95%CI) | -0.03 [-0.67, 0.61]    | 0.92    | 73%            |
| Preoperative basal LES pressure           | 3       | 330          | MD (IV, Random, 95%CI) | 0.75 [-1.05, 2.55]     | 0.41    | 0%             |
| Preoperative 4sIRP                        | 2       | 165          | MD (IV, Random, 95%CI) | 0.86 [-2.23, 3.95]     | 0.59    | 31%            |
| Preoperative barium column diameter       | 3       | 275          | MD (IV, Random, 95%CI) | 0.33 [-0.03, 0.69]     | 0.08    | 0%             |
| Operation time                            | 5       | 474          | MD (IV, Random, 95%CI) | -15.01 [-20.34, -9.67] | <0.001  | 63%            |
| Length of hospital stay                   | 3       | 275          | MD (IV, Random, 95%CI) | 0.25 [-0.14, 0.63]     | 0.21    | 37%            |
| Perioperative complications               | 4       | 401          | RR (MH, Random, 95%CI) | 0.68 [0.26, 1.75]      | 0.42    | 63%            |
| Clinical success                          | 5       | 474          | RR (MH, Random, 95%CI) | 1.02 [0.97, 1.09]      | 0.40    | 0%             |
| Postoperative Eckardt score               | 5       | 474          | MD (IV, Random, 95%CI) | 0.05 [-0.07, 0.16]     | 0.45    | 0%             |
| Change in Eckardt score                   | 4       | 401          | MD (IV, Random, 95%CI) | -0.02 [-0.60, 0.57]    | 0.95    | 63%            |
| Postoperative basal LES pressure          | 4       | 403          | MD (IV, Random, 95%CI) | -1.00 [-3.93, 1.93]    | 0.50    | 85%            |
| Postoperative 4sIRP                       | 3       | 238          | MD (IV, Random, 95%CI) | -0.13 [-1.88, 1.61]    | 0.88    | 75%            |
| Postoperative barium column diameter      | 2       | 165          | MD (IV, Random, 95%CI) | 0.09 [-0.37, 0.55]     | 0.71    | 31%            |
| Reflux symptoms                           | 4       | 403          | RR (MH, Random, 95%CI) | 0.94 [0.51, 1.74]      | 0.84    | 48%            |
| Reflux esophagitis on endoscopy           | 4       | 401          | RR (MH, Random, 95%CI) | 0.61 [0.39, 0.98]      | 0.04    | 0%             |
| Pathologic acid exposure on pH monitoring | 2       | 165          | RR (MH, Random, 95%CI) | 0.58 [0.36, 0.94]      | 0.03    | 0%             |

4sIRP, 4-sec integrated relaxation pressure; CI, confidence interval; GERD, gastroesophageal reflux disease; IV, inverse variance; LES, lower esophageal sphincter; MH, Mantel-Haenszel; MD, mean difference; RR, risk ratio

**Supplementary Table 3** Technical details of POEM in individual studies

| Author, year<br>[Suppl. Ref.] | Orientation<br>of myotomy | Depth of myotomy                                                                                                                             | PPI use   |                         |
|-------------------------------|---------------------------|----------------------------------------------------------------------------------------------------------------------------------------------|-----------|-------------------------|
|                               |                           |                                                                                                                                              | Inpatient | Outpatient              |
| Familiari,<br>2016 [1]        | NR                        | NR                                                                                                                                           | NR        | NR                      |
| Gu, 2020 [2]                  | Posterior<br>approach     | Circular myotomy                                                                                                                             | IV PPI    | Oral PPI<br>for 2 weeks |
| Huang,<br>2020 [3]            | NR                        | Circular myotomy                                                                                                                             | NR        | Oral PPI<br>for 2 weeks |
| Li, 2019 [4]                  | Variable                  | Progressively increased from circular myotomy at the upper end of myotomy to full-thickness myotomy at the lower end                         | IV PPI    | Oral PPI<br>for 4 weeks |
| Nabi, 2020 [5]                | Anterior<br>approach      | Circular myotomy in the upper part of myotomy and full-thickness myotomy from 2-3 cm above the gastroesophageal junction until the lower end | NR        | NR                      |

IV, intravenous; NR, not reported; POEM, peroral endoscopic myotomy; PPI, proton pump inhibitor

**Supplementary Table 4** Specific perioperative complications that occurred in individual studies

| Author, year [Suppl. Ref.] | Complication                            | Short myotomy | Standard myotomy |
|----------------------------|-----------------------------------------|---------------|------------------|
| Familiari, 2016 [1]        | NR                                      | NR            | NR               |
| Gu, 2020 [2]               | Mucosal injury                          | 0             | 1                |
| Huang, 2020 [3]            | Mucosal perforation                     | 0             | 1                |
|                            | Major bleeding                          | 2             | 3                |
|                            | Pneumothorax                            | 1             | 2                |
| Li, 2019 [4]               | Mucosal injury                          | 4             | 5                |
|                            | Pneumothorax                            | 0             | 1                |
|                            | Pneumoperitoneum                        | 2             | 3                |
|                            | Pneumomediastinum                       | 0             | 1                |
|                            | Subcutaneous emphysema                  | 0             | 14               |
| Nabi, 2020 [5]             | Mucosal injury requiring clipping       | 1             | 1                |
|                            | Minor bleeding                          | 12            | 17               |
|                            | Subcutaneous emphysema                  | 4             | 4                |
|                            | Capnoperitoneum requiring decompression | 3             | 3                |
|                            | Retroperitoneal CO <sub>2</sub>         | 4             | 2                |

NR, not reported

**Supplementary Table 5** Grades of reflux esophagitis in individual studies based on the LA classification of esophagitis

| Author, year [Suppl. Ref.] | LA grade | Total | Short myotomy | Standard myotomy |
|----------------------------|----------|-------|---------------|------------------|
| Familiari, 2016 [1]        | NR       | NR    | NR            | NR               |
| Gu, 2020 [2]               | A and B  | 10    | NR            | NR               |
|                            | C        | 1     | NR            | NR               |
| Huang, 2020 [3]            | A        | 5     | 1             | 4                |
|                            | B        | 2     | 0             | 2                |
| Li, 2019 [4]               | NR       | NR    | NR            | NR               |
| Nabi, 2020 [5]             | A        | 13    | 5             | 8                |
|                            | B        | 14    | 5             | 9                |
|                            | C        | 1     | 0             | 1                |

LA, Los Angeles; NR, not reported

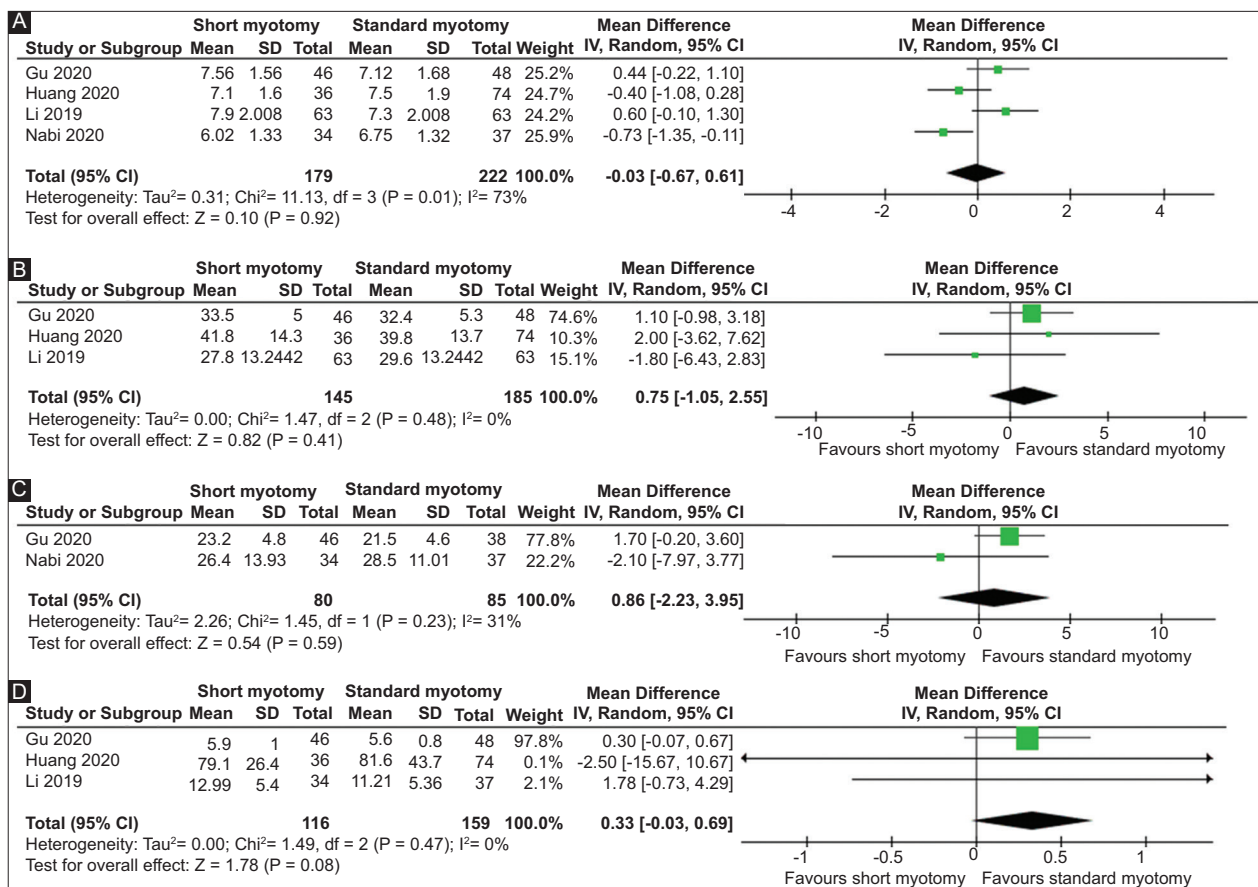

**Supplementary Figure 1** Forest plots comparing short myotomy and standard myotomy regarding preoperative characteristics. (A) Preoperative Eckardt score. (B) Preoperative basal lower esophageal sphincter pressure. (C) Pre-operative 4-sec integrated relaxation pressure. (D) Preoperative barium column diameter  
CI, confidence interval

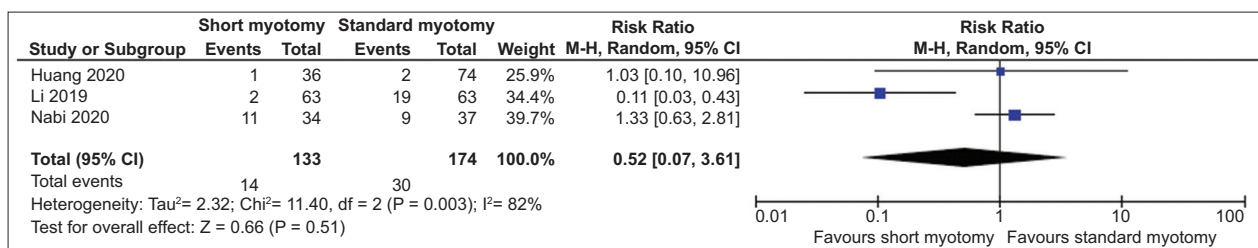

**Supplementary Figure 2** Forest plot comparing short myotomy and standard myotomy regarding perioperative gas-related complications  
CI, confidence interval

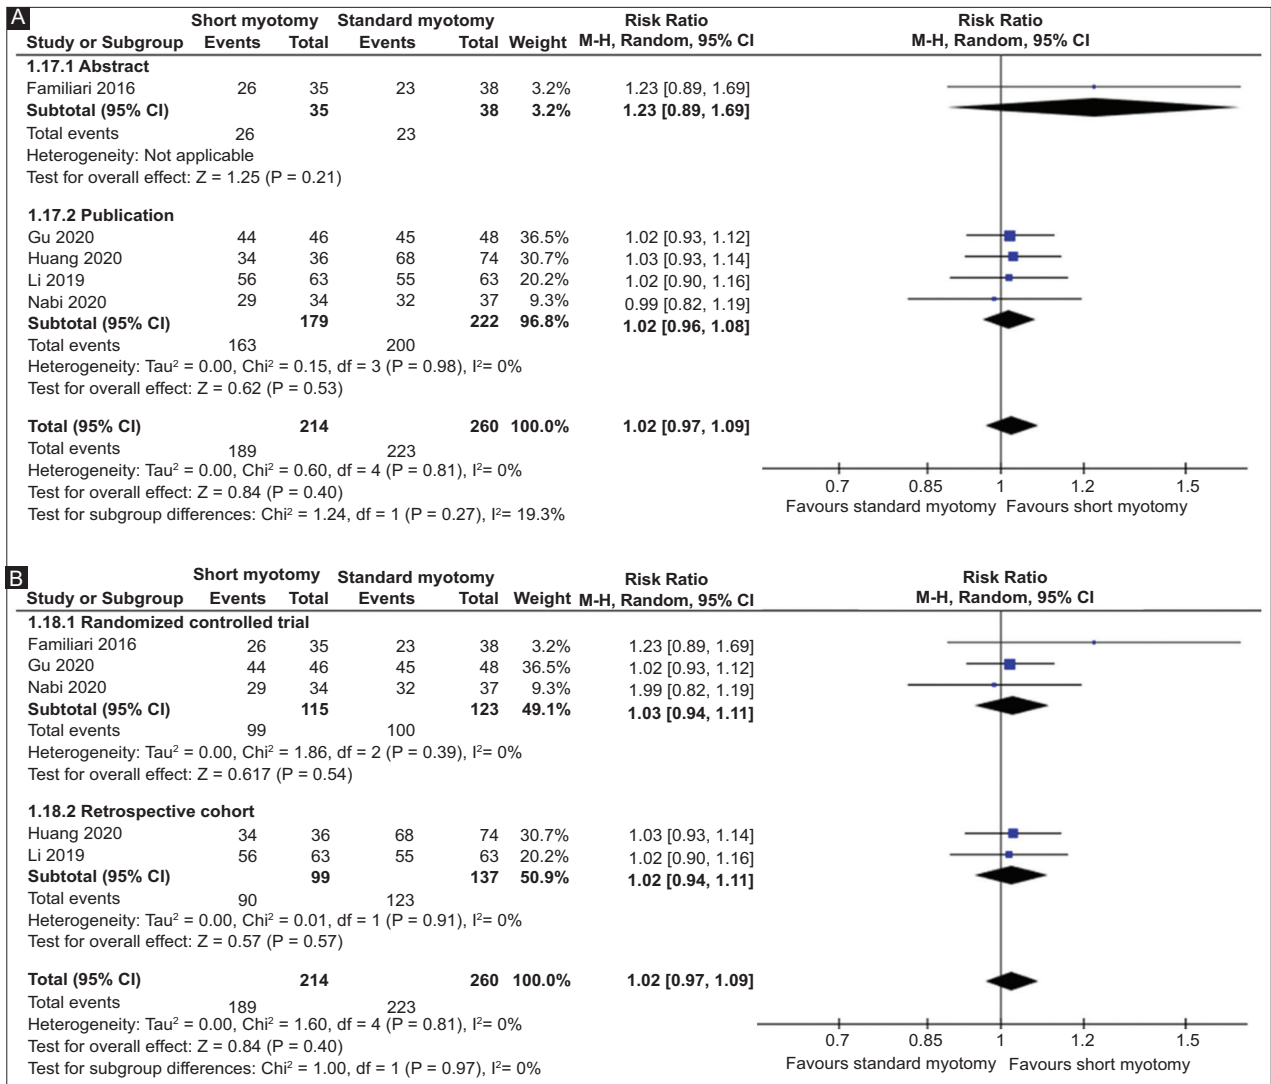

**Supplementary Figure 3** Subgroup analysis comparing short myotomy and standard myotomy regarding clinical success rate based on (A) publication status and (B) study design  
CI, confidence interval

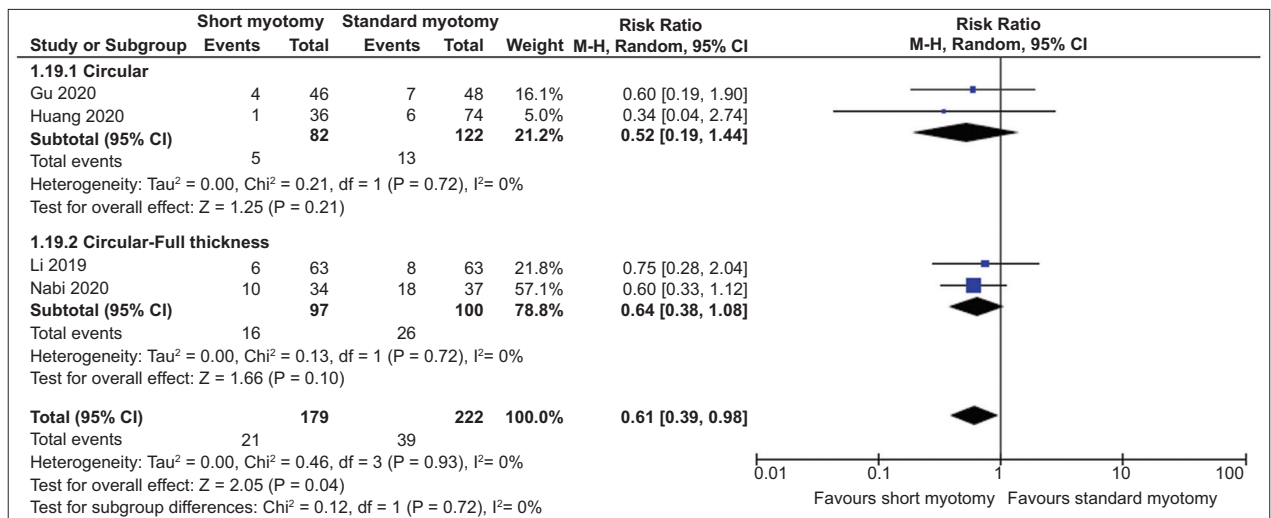

**Supplementary Figure 4** Subgroup analysis comparing short myotomy and standard myotomy regarding reflux esophagitis based on depth of myotomy  
CI, confidence interval

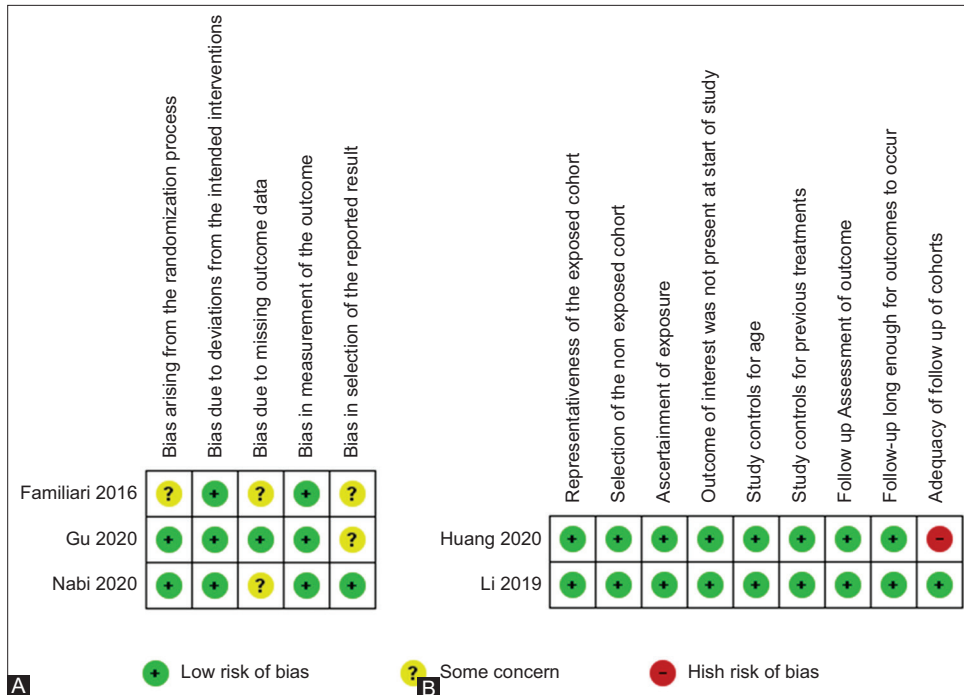

**Supplementary Figure 5** Quality assessment of the included studies using (A) revised Cochrane risk of bias tool for randomized controlled trials and (B) Newcastle-Ottawa scale for cohort studies

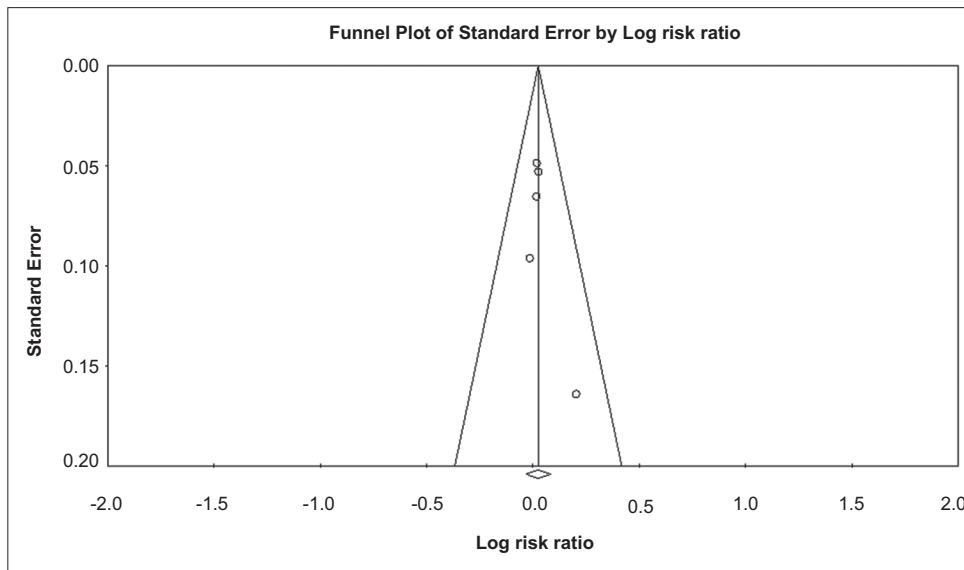

**Supplementary Figure 6** Funnel plot showing publication bias analysis for clinical success rate

### Supplementary References

1. Familiari P, Cali A, Landi R, et al. Long vs short POEM for the treatment of achalasia. Interim analysis of a randomized controlled trial. *Dig Liver Dis* 2016;**48**:e90.
2. Gu L, Ouyang Z, Lv L, Liang C, Zhu H, Liu D. Safety and efficacy of peroral endoscopic myotomy with standard myotomy versus short myotomy for treatment-naïve patients with type II achalasia: a prospective randomized trial. *Gastrointest Endosc* 2021;**93**:1304-1312.
3. Huang S, Ren Y, Peng W, et al. Peroral endoscopic shorter versus longer myotomy for the treatment of achalasia: a comparative retrospective study. *Esophagus* 2020;**17**:477-483.
4. Li L, Chai N, Linghu E, et al. Safety and efficacy of using a short tunnel versus a standard tunnel for peroral endoscopic myotomy for Ling type IIc and III achalasia: a retrospective study. *Surg Endosc* 2019;**33**:1394-1402.
5. Nabi Z, Ramchandani M, Sayyed M, et al. Comparison of short versus long esophageal myotomy in cases with idiopathic achalasia: a randomized controlled trial. *J Neurogastroenterol Motil* 2020.
